RESEARCH ARTICLE

# The Yield of Community-Based “Retrospective” Tuberculosis Contact Investigation in a High Burden Setting in Ethiopia

Zewdu Gashu<sup>1\*</sup>, Degu Jerene<sup>1</sup>, Mitiku Ensermu<sup>1</sup>, Dereje Habte<sup>1</sup>, Muluken Melese<sup>1</sup>, Nebiyu Hiruy<sup>1</sup>, Endale Shibeshi<sup>1</sup>, Shallo D. Hamusse<sup>2</sup>, G. Nigussie<sup>3</sup>, B. Girma<sup>1</sup>, Yewulsew Kassie<sup>4</sup>, Yared Kebede Haile<sup>4</sup>, Pedro Suarez<sup>5</sup>

**1** Management Sciences for Health, Help Ethiopia Address the Low Performance of Tuberculosis (HEAL TB) Project, Addis Ababa, Ethiopia, **2** Oromia regional Health Bureau, Addis Ababa, Ethiopia, **3** Amhara regional Health Bureau, Bahirdar, Ethiopia, **4** United States Agency for International Development (USAID), Addis Ababa, Ethiopia, **5** Management Sciences for Health, Center for Health Services, Arlington, Virginia, United States of America

☉ These authors contributed equally to this work.

\* [zgashu@msh.org](mailto:zgashu@msh.org); [zewdugashudememew@yahoo.com](mailto:zewdugashudememew@yahoo.com)

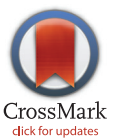

**OPEN ACCESS**

**Citation:** Gashu Z, Jerene D, Ensermu M, Habte D, Melese M, Hiruy N, et al. (2016) The Yield of Community-Based “Retrospective” Tuberculosis Contact Investigation in a High Burden Setting in Ethiopia. PLoS ONE 11(8): e0160514. doi:10.1371/journal.pone.0160514

**Editor:** David W. Dowdy, Johns Hopkins University Bloomberg School of Public Health, UNITED STATES

**Received:** February 2, 2016

**Accepted:** July 20, 2016

**Published:** August 2, 2016

**Copyright:** This is an open access article, free of all copyright, and may be freely reproduced, distributed, transmitted, modified, built upon, or otherwise used by anyone for any lawful purpose. The work is made available under the [Creative Commons CC0](https://creativecommons.org/licenses/by/4.0/) public domain dedication.

**Data Availability Statement:** All relevant data are within the paper and its Supporting Information files.

**Funding:** The United States Agency for International Development (USAID) supported this work through HEAL TB, under cooperative agreement number AID-663-A-11-00011. The contents of the article are the responsibility of the authors alone and do not necessarily reflect the views of USAID or the United States government.

## Abstract

### Objective

To determine the yield and determinants of retrospective TB contact investigation in selected zones in Ethiopia.

### Materials and Methods

This was a community-based cross-sectional study conducted during June–October 2014. Trained lay providers performed symptom screening for close contacts of index cases with all types of TB registered for anti-TB treatment within the last three years. We used logistic regression to determine factors associated with TB diagnosis among the contacts.

### Results

Of 272,441 close contacts of 47,021 index cases screened, 13,886 and 2,091 had presumptive and active TB respectively. The yield of active TB was thus 768/100,000, contributing 25.4% of the 7,954 TB cases reported from the study zones over the study period. The yield was highest among workplace contacts (12,650/100,000). Active TB was twice more likely among contacts whose index cases had been registered for TB treatment within the last 12 months compared with those who had been registered 24 or more months earlier (adjusted odds ratio, AOR: 1.77 95% CI 1.42–2.21). Sex or clinical type of TB in index cases was not associated with the yield. Smear negative (SS-) index cases (AOR: 1.74 95% CI 1.13–2.68), having index cases who registered for treatment within <12 months (AOR:

**Competing Interests:** The authors have declared that no competing interests exist.

**Contributions:**

**Conceptualization:** DJ BG MM ME.

**Data curation:** ZG ES NH DH.

**Formal analysis:** ZG DH NH.

**Funding acquisition:** MM YK YH PS.

**Investigation:** DJ ME BG ZG MM SH GN.

**Methodology:** ME DJ BG MM ZG.

**Project administration:** MM DJ ME YH YK PS ZG.

**Resources:** MM DJ ME.

**Software:** ES ZG BG NH DH.

**Supervision:** ME SH GN DJ MM.

**Visualization:** ZG DJ DH MM NH.

**Writing - original draft:** ZG.

**Writing - review & editing:** ZG DJ DH MM NH.

2.41 95% CI 1.51–3.84) and being household contact (AOR: 0.072 95% CI 0.01–0.52) were associated with the occurrence of active TB in children.

## Conclusions

The yield of retrospective contact investigation was about six times the case notification in the study zones, contributing a fourth of all TB cases notified over the same period. The yield was highest among workplace contacts and in those with recent past history of contact. Retrospective contact screening can serve as additional strategy to identify high risk groups not addressed through currently recommended screening approaches.

## Introduction

Despite improvements in TB prevention and control efforts worldwide, national TB control programs miss a significant proportion of TB patients in many low and middle-income settings [1]. There is also delay in diagnosing TB and initiating treatment [2–5]. About one third of all incident cases of active TB are not properly diagnosed and there is a diagnostic delay in high TB burden settings [1, 6]. This is more pronounced in population groups with poor access to health care [4]. Even when physical access to health services is not a major challenge, people fail to seek health care for TB related complaints as people infected with TB are not symptomatic during early stages of the disease [7, 8]. Therefore, active case finding strategies are needed to detect and treat patients who are not identified through the usual passive approach.

Systematic screening of close contacts of smear positive pulmonary TB (SS+) is one of the globally recommended active case finding strategies [9]. Accordingly, contact investigation is done “prospectively”, along the course of treatment of the index case [9, 10]. We previously reported our experience with implementing contact investigation among household contacts in two regions of Ethiopia indicating significant contribution of the intervention to overall TB case finding [11].

However, organizing prospective follow up of all close contacts is not adhered to because of logistical difficulties [12, 13]. Besides, earlier contact investigation studies in Ethiopia used only household contacts of SS+ index cases [11, 14]. While there is some evidence that TB among close contacts of SS- [15–17] and in contacts other than households [18, 19] is high, this has not been demonstrated in routine program settings.

We introduced a “retrospective” contact screening approach whereby all clinical types of TB cases treated in the previous three years were listed and their contacts were traced to determine if they had developed symptoms of TB. Our objective was to determine the yield of “retrospective” community-based TB contact investigation and identify factors associated with occurrence of TB among the contacts in selected six zones in Ethiopia.

## Materials and Methods

### Design and Setting

We conducted a community based cross-sectional study in six zones with population of over 14 million in Oromia and Amhara regions of Ethiopia between June-October 2014. These zones had a higher case notification rate (CNR) of more than 130 per 100,000 from 2011–2014. The two regions have implemented the DOTS strategy for the last two decades [20, 21]. The regional health bureaus of the two regions led the implementation of the study with support

from the Help Ethiopia Address the Low Performance of TB (HEAL TB), a project funded by the United States Agency for International Development (USAID).

## Data Collection

We recruited and trained lay providers to do active tracing and symptomatic screening of contacts of TB index cases. These lay providers also served as data collectors. They were recruited and deployed from the same *Kebeles* (the smallest administrative unit) of their residence, for easy tracing of past TB patients and their contacts. The data collectors were high school graduates. Together with TB focal persons and health extension workers (HEWs), they received a 2-day training on the basics of symptoms of TB including the screening algorithm, data collecting tools and standard operating procedures of the study.

## Definitions

We defined an *index case* as PTB or extra-pulmonary TB (EPTB) identified within a household registered at health facilities. A *close contact* is a person who shared the same enclosed living space for one or more nights or for frequent or extended periods during the day with the index case during the 3 months before the diagnosis of TB, such as household family, co-workers sharing same enclosed workplace or neighbors [19]. If close contacts are other than household, co-worker or neighbor they were classified as "other". The approximate dates of contacts' last exposure to the patients were determined using the treatment initiation data of the patients [22].

We used locally-adopted and translated version of standard symptom-based screening criteria developed by the World Health Organization [9, 10]. The criteria used in adult contacts were cough, weight loss, fever and night sweating. In child contacts the criteria were cough, weight loss or failure to gain weight, reduced playfulness, fever or/and night sweating. Presumptive TB case was defined when cough or two or more of the symptoms other than cough persisted for at least two weeks [9, 10].

TB case definition was based on the standard definitions of the National TB and leprosy control program guideline of Ethiopia for the diagnosis and treatment of TB cases [23]. Accordingly, SS+ is a patient with at least two initial sputum smear examinations positive for acid fast bacilli (AFB) by direct microscopy, or one initial smear examination positive for AFB by direct microscopy and culture positive, or one initial smear examination positive for AFB by direct microscope and radiographic abnormalities consistent with active TB as determined by a clinician. SS- is a patient with symptoms suggestive of TB with at least three AFB negative sputum smear examinations, radiographic abnormalities consistent with active pulmonary TB, no response to a course of broad spectrum antibiotics and a decision by a clinician to treat with a full course of anti-TB chemotherapy. EPTB is a patient who has TB in organs other than the lungs, with at least one specimen with *M. tuberculosis* or histological or strong clinical evidence consistent with active EPTB, followed by a decision by a clinician to treat with a full course of tuberculosis chemotherapy.

## The Procedure for Contact Investigation

We listed all TB cases registered for TB treatment from mid-2011 to mid-2014 in the health facility registers. Using the list, data collectors visited the index cases and traced their close contacts. The lay providers used the symptom-based screening criteria to screen the contacts. Thus, contacts that fulfilled the criteria for presumptive TB were documented as screen result positive. Otherwise, they were screen result negative. Screen negative under-five children were referred for Isoniazid preventive therapy (IPT) to health facilities.

The lay providers referred presumptive TB cases to health centers using TB suspect referral slip. At health centers, sputum examination was done using Ziehl-Neelson (ZN) microscopy,

the nationally recommended TB diagnostic method [23]. Presumptive TB cases gave three sputum samples, morning-spot-morning, to diagnose pulmonary TB. EPTB and clinically suspected SS– were referred to hospitals and private clinics for chest radiography and other necessary investigations for TB. Health care workers at the health centers sent back the sputum result of the suspects to the lay providers using the feedback section of the suspect referral slip. The lay providers registered the sputum result on the contact register.

The HEWs closely monitored the work of data collectors and reviewed their performance on a monthly basis. Zonal and district TB focal persons supervised the implementation of these activities as part of their routine work.

## Data Management and Analysis

We used contact registers for the registration of traced and symptomatically screened contacts. The register had the following variables: types of index TB cases, age and sex of contacts, number of contacts per index case, type of contacts, contacts screened, screening result, presence or absence of active TB, and type of TB cases identified. The register served as primary data source for the study based on which data entry template was prepared using the Cis-pro software. We exported the data to STATA for analysis. We have uploaded the minimal data set without identifier of the study participants as supporting information ([S1 Dataset](#)).

To ensure data quality, randomized blinded quality check was made. Data was also entered to excel based performance monitoring system for consistency check. In addition, each data element was run independently to identify data entry errors. Zonal and district TB focal persons supervised the data collection to ensure completeness of data. Hence, there was only 0.23–0.44% missed data. Average imputation method for age, common-point imputation for period when index cases registered for anti-TB and modal imputation for type of contacts and sex was applied to fill in the missed values [24]. There was no unique pattern in the missing data on these variables.

We used frequency, percentage and mean to describe index cases and their contacts. The yield is described using proportion and per 100,000 of contacts with 95% confidence interval (95% CI). We used logistic regression analysis to determine factors associated with TB diagnosis among the contacts. The outcome variable, TB diagnosis, was labeled as 1 if TB was detected and 0 if no TB detected. Variables with p-value less than 0.2 in univariate analysis were included in the multivariable analysis. We conducted a subgroup analysis of child contacts <15 years to determine factors associated with cases of TB in children.

## Ethical Statement

Ethics Review Committees of Oromia and Amhara Regional Health Bureaus approved the study protocol, oral informed consent procedure and the data collection tool. Letters of permission to implement the intervention and access to TB registers were obtained from relevant authorities. Only contacts who gave oral consent to participate in this study were screened for TB. We used oral consent because the study included predominantly rural population who could not read and write. In the contacts of age less than 18 years, their parents or guardian were asked for consent. Contacts with TB diagnosis received care according to the standard practice.

## Results

### Characteristics of Index Cases and their Contacts

We included 47,021 index cases registered in the 427 health facilities of the study zones during the five month of study period. About 43% of these had been registered for anti-TB treatment

before 24 months during data collection period. The rest (57.3%) initiated the treatment within 24 months of data collection period. Forty-one percent of the index cases were SS+.

Of 272,515 eligible close contacts approached, the lay workers screened 272,441(99.97%) close contacts. The proportion of screened contacts among total population in the study zones was 1.9%. The ratio of contacts to index cases was 5.8. About 43% of the contacts were identified from SS+ index cases whereas the respective 29% and 28% were from SS- and EPTB index cases. Household, neighbor, work place and other contacts constituted 63%, 11.3%, 0.6% and 25.7% respectively. About 52.5% and 64.6% of the contacts were male and adults or adolescents of age greater than 14 years, respectively ([Table 1](#)).

### The Yield of TB Screening

Of those screened, 13,886 (5.1%) and 2,091 (0.8%) were found to have presumptive and active TB respectively. The yield of all forms of TB per 100,000 contacts was thus 768/100,000. Of

**Table 1. Characteristics of index cases registered and contacts with index cases approached for screening in the six study zones, June–October 2014, Ethiopia.**

| Variables                                                                      | Number | Percent (%) |
|--------------------------------------------------------------------------------|--------|-------------|
| <b>Index cases</b>                                                             |        |             |
| <b>By type of TB</b>                                                           |        |             |
| SS+                                                                            | 19235  | 40.9        |
| SS-                                                                            | 13652  | 29          |
| EPTB                                                                           | 14134  | 30.1        |
| Total                                                                          | 47021  | 100         |
| <b>By the period they registered for treatment</b>                             |        |             |
| <12 months                                                                     | 15251  | 32.4        |
| 12–23 months                                                                   | 11678  | 24.8        |
| > = 24 months                                                                  | 20092  | 42.7        |
| <b>Contacts with index case registered</b>                                     |        |             |
| <b>Contacts approached by type of index cases</b>                              |        |             |
| SS+                                                                            | 116324 | 42.7        |
| SS-                                                                            | 78721  | 28.9        |
| EPTB                                                                           | 77470  | 28.4        |
| Total                                                                          | 272515 |             |
| <b>Type of contacts</b>                                                        |        |             |
| House hold                                                                     | 170136 | 62.4        |
| Neighbor                                                                       | 30585  | 11.3        |
| Workplace                                                                      | 1643   | 0.6         |
| Other                                                                          | 70151  | 25.7        |
| <b>Contacts by sex</b>                                                         |        |             |
| Male                                                                           | 143143 | 52.5        |
| Female                                                                         | 129372 | 47.5        |
| <b>Contacts by Age Category</b>                                                |        |             |
| <5 years                                                                       | 22655  | 8.3         |
| 05–14 years                                                                    | 73963  | 27.1        |
| > = 15 years                                                                   | 175897 | 64.6        |
| <b>Contacts based on the period their index cases registered for treatment</b> |        |             |
| <12 months                                                                     | 89822  | 33          |
| 12–23 months                                                                   | 66669  | 24.5        |
| > = 24 months                                                                  | 116024 | 42.6        |

doi:10.1371/journal.pone.0160514.t001

the 2,091 active TB cases diagnosed through contact screening, 77.4% were SS- while 16.5% were SS+ cases. Active TB cases detected through the retrospective screening constituted 25.4% of the 7,954 TB cases reported in the study zones during the study period. The prevalence of SS+ among the adult contacts was 106/100,000. The proportion of SS+ among presumptive TB cases was 2.5%. TB cases detected among household contacts were 0.96%. Also, the respective yield per 100,000 among households, neighbors and workplace contacts was 861, 1053 and 12,650 (Fig 1). For contacts whose index cases registered for treatment < 12 months, 12–23 months and  $\geq$  24 months, the respective yield per 100,000 contacts were 1106, 600 and 602 (Fig 2).

After adjusting for co-variables, the rate of active TB was 1.77 times higher among contacts whose index cases registered for treatment within the last 12 months than contacts that had been exposed 24 or more months earlier (AOR: 1.77 95% CI 1.42–2.21). The rate of active TB was higher in the age group of 25–34 years (AOR: 1.80 95% CI 1.2–2.62) and 35–44 years (AOR: 2.14 95% CI 1.42–3.22) as compared to under-five children. The odds of active TB cases from neighbor (AOR: 1.35, 95% CI 1.02–1.78) and workplace (AOR: 3.95; 95% CI 2.21–7.03) were significantly higher than active TB cases detected from household contacts. However, the yield from contacts of "other" category was less than the yield from household contacts (AOR: 0.13, 95% CI 0.08–0.20). There was no significant difference in yield between close contacts of SS+ index cases and those of EPTB (AOR: 0.88; 95% CI 0.69–1.13) and SS- index cases (AOR: 1.19; 95% CI 0.95–1.49) (Table 2).

Being contact of SS- index cases (AOR: 1.74 95% CI 1.13–2.68), having index cases who registered for treatment within <12 months (AOR: 2.41 95% CI 1.51–3.84), and being household contact (AOR: 0.072 95% CI 0.01–0.52) were factors that were significantly associated with the occurrence of active TB in children (Table 3).

## Discussion

To our knowledge, this is the first report of the yield of retrospective TB contact screening in a community setting in Ethiopia through which we were able to detect over two thousand TB cases. The yield was about six times the case notification rate in the study zones and contributed about a quarter of all notified cases over the same period. Our findings suggest that retrospective contact screening can be considered a useful strategy for identifying additional TB cases not addressed through the routinely implemented case finding strategies.

Earlier studies reported the yield of contact screening among household contacts of SS+ index cases using prospective screening approach [11, 14, 25–29]. The yield of 0.96% among household contacts in the current study is comparable with what was reported by Salinas et al [30]. On the contrary, it is lower than the yield by the prospective approaches; 2.5% in similar setting in Ethiopia [11], 6.07% in South Africa [28] and the global average of 3.1% [31]. However, the overall yield in our study is about six times the case notification rate in the study zones during the same time period. The yield among contacts whose index cases registered for TB treatment within 12 months was eight times the TB case notification in the study zones. Thus, our finding clearly highlights the need to include retrospective contact screening, at least for contacts whose index cases registered for treatment within the past one year, as one of the strategies for case detection.

The 2.5% SS+ cases among the presumptive TB cases in this study might be underestimate but still relatively higher than the corresponding rate of 1.2% in the Ethiopian National TB prevalence survey [32]. However, the 106/100,000 prevalence of SS+ among the adult contacts is much higher than the result from the TB prevalence survey in Eritrea [33] and equivalent to the prevalence of 108/100,000 in the national TB prevalence survey in Ethiopia [32].

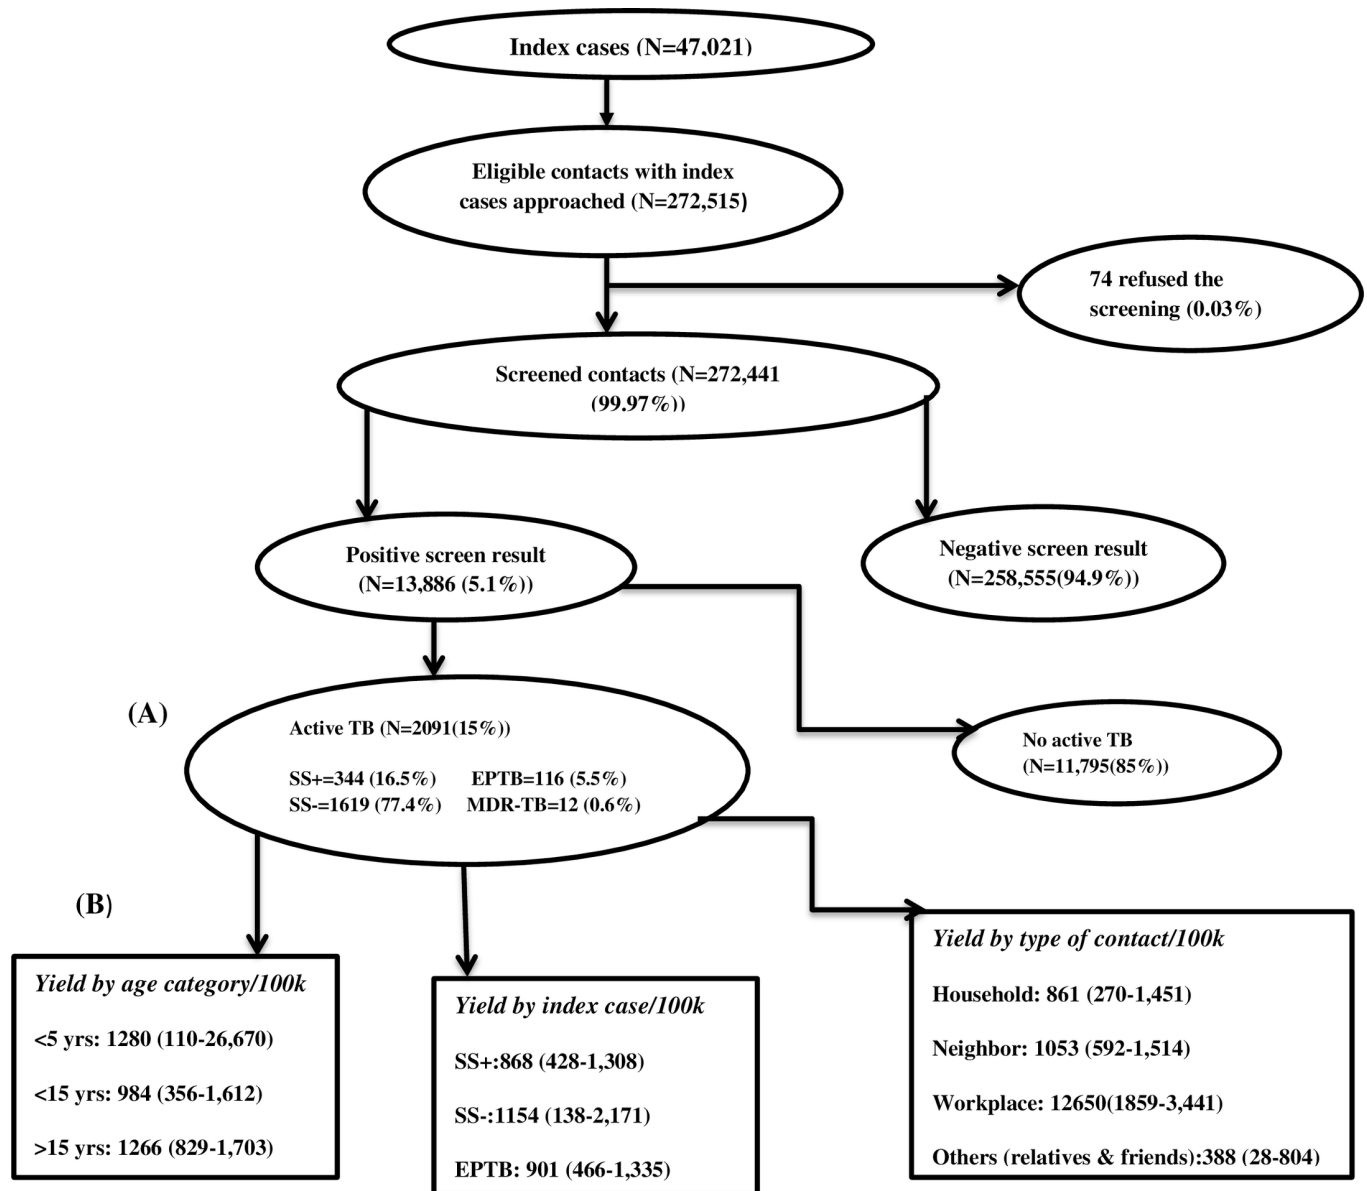

**Ethiopia.** (A) Contacts that fulfilled the criteria for presumptive TB were documented as screen result positive. Proportion of TB categories (SS+(smear positive TB), SS-(smear negative TB), EPTB (extra-pulmonary TB) & MDR-TB (multi-drug resistance TB)) was from all TB cases identified (2,091). (B) Yield of TB for age categories, type of index cases and contacts was computed per 100k (100,000) of their respective contacts. Ranges in parentheses are 95% Confidence Intervals.

**Fig 1. Flow diagram of screening and yield of retrospective contact investigation, June-October 2014, Ethiopia.**

doi:10.1371/journal.pone.0160514.g001

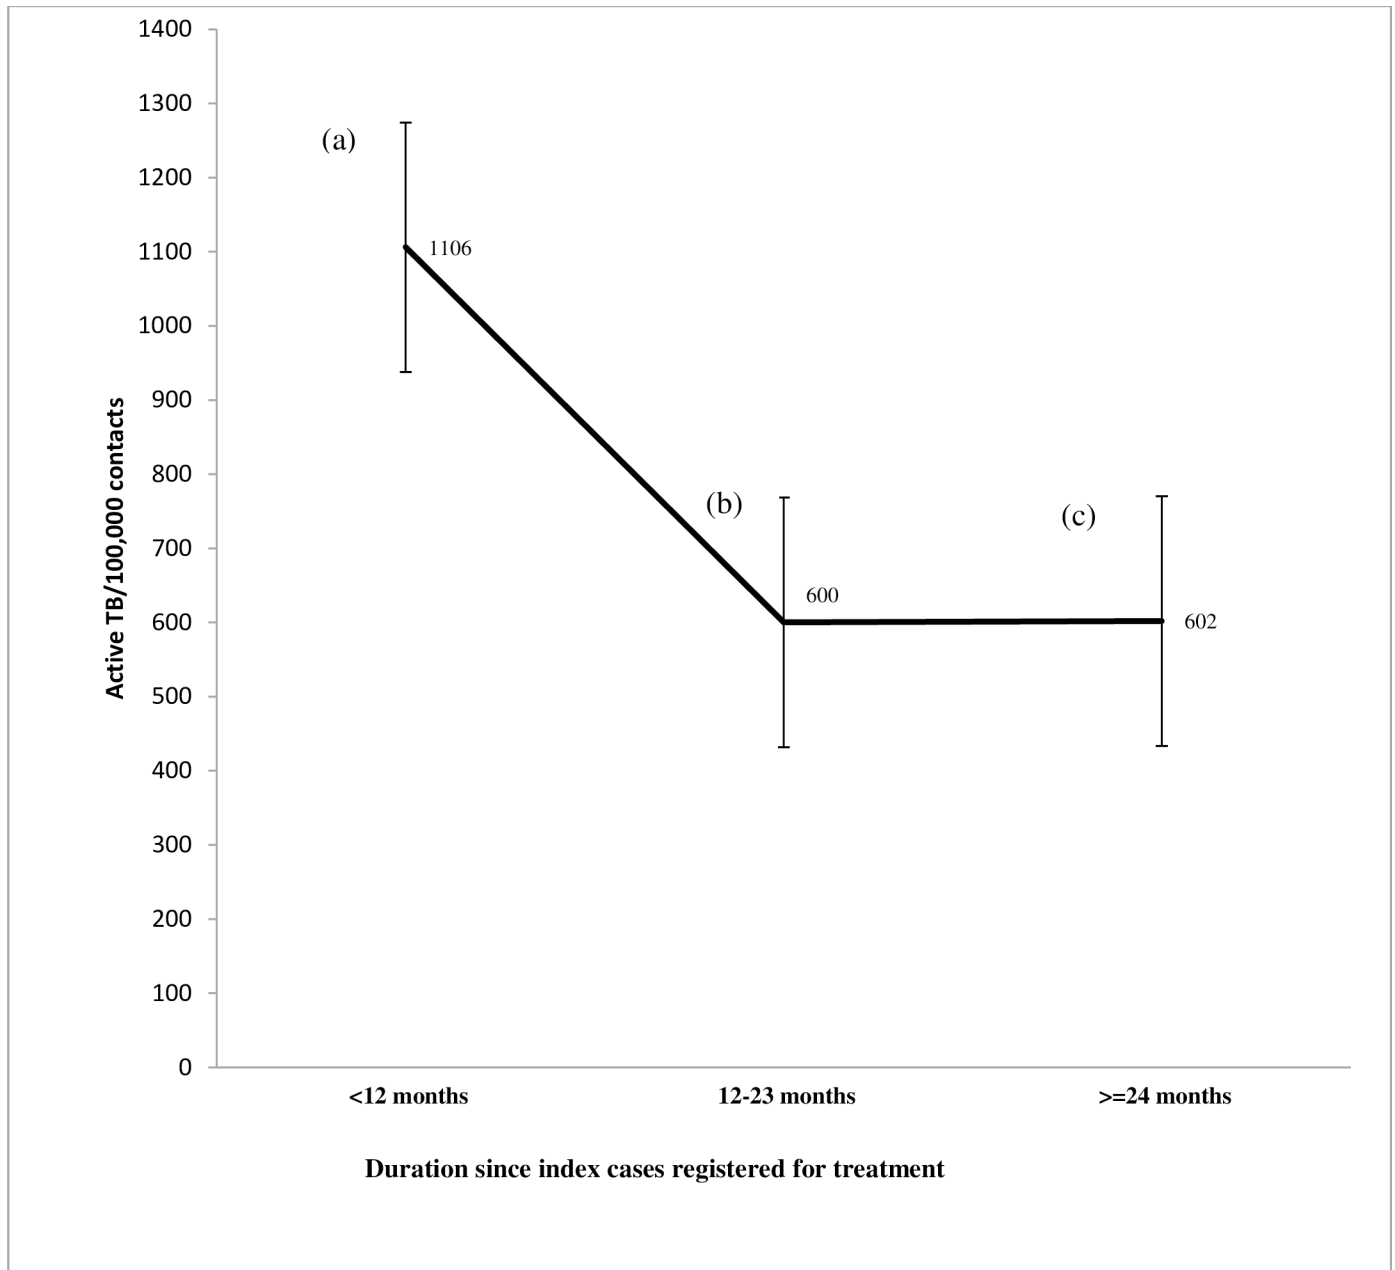

Line bars; (a) (923-1288), (b) (418-754) and (c) (423-749) indicate 95% Confidence Intervals (CIs) for the yield of TB per 100,000 of contacts of index cases registered for TB treatment during <12 moths, 12-23 months & >= 24 moths, respectively. The CI of the yield from contacts whose index case registered within one year during the study period is not overlapping and higher than the CI of the yields from contacts whose index cases registered for treatment during 12-23 months or more.

**Fig 2. Yield per 100,000 contacts based on the time since index cases registered for TB treatment.**

doi:10.1371/journal.pone.0160514.g002



**Table 2. Factors associated with active TB in retrospective contact investigation, June–October 2014 Ethiopia.**

| Variables                                           | Active TB case (%) | Active TB [1] versus non-TB[0] cases |                  |             |                  |
|-----------------------------------------------------|--------------------|--------------------------------------|------------------|-------------|------------------|
|                                                     |                    | COR                                  | 95% CI           | AOR         | 95% CI           |
| <b>Year index cases registered for TB treatment</b> |                    |                                      |                  |             |                  |
| <12 months                                          | 993 (1.4)          | <u>2.04</u>                          | <u>1.64–2.54</u> | <u>1.77</u> | <u>1.42–2.21</u> |
| 12–23months                                         | 400 (0.7)          | 0.98                                 | 0.74–1.30        | 0.93        | 0.7–1.24         |
| > = 24 months                                       | 698 (0.7)          | 1                                    |                  |             |                  |
| <b>Type of Index cases registered</b>               |                    |                                      |                  |             |                  |
| SS+                                                 | 854 (0.9)          | 1                                    |                  |             |                  |
| EPTB                                                | 507 (0.7)          | 0.8                                  | 0.63–1.03        | 0.88        | 0.69–1.13        |
| SS-                                                 | 730 (1.1)          | 1.23                                 | 0.98–1.53        | 1.19        | 0.95–1.49        |
| <b>Age Category of contacts</b>                     |                    |                                      |                  |             |                  |
| Children (<15 years)                                | 581 (0.7)          | <u>0.68</u>                          | <u>0.54–0.84</u> | <u>0.55</u> | <u>0.44–0.69</u> |
| Adult (>15 years)                                   | 1510 (1.0)         | 1                                    |                  |             |                  |
| <b>Sex of Contacts</b>                              |                    |                                      |                  |             |                  |
| Female                                              | 951 (0.74)         | 1                                    |                  |             |                  |
| Male                                                | 1140 (0.80)        | 1.15                                 | 0.95–1.40        | 1.12        | 0.92–1.37        |
| <b>Type of contacts</b>                             |                    |                                      |                  |             |                  |
| House hold                                          | 1627(1.1)          | 1                                    |                  |             |                  |
| Neighbor                                            | 352(1.4)           | 1.23                                 | 0.94–1.62        | <u>1.35</u> | <u>1.02–1.78</u> |
| Workplace                                           | 78(4.8)            | <u>4.5</u>                           | <u>2.55–7.94</u> | <u>3.95</u> | <u>2.21–7.03</u> |
| Other                                               | 34(0.2)            | <u>0.14</u>                          | <u>0.09–0.22</u> | <u>0.13</u> | <u>0.08–0.20</u> |

doi:10.1371/journal.pone.0160514.t002

Our study revealed a significantly higher yield of active TB among workplace contacts as compared to other types of contacts. This might be due to the fact that the index cases share the same enclosed space for longer hour and the spaces might be overcrowded and poorly ventilated coupled with the little awareness on TB prevention [34]. A study on contact screening at workplace from Portugal revealed that the yield was 8.4 TB cases per index case [19]. This

**Table 3. Determinants of active TB in children <15 years through retrospective contact screening, June–October 2014, Ethiopia.**

| Variables                                   | Number (%) of active TB | Active TB [1] and no TB [0] in children <15 years of age |                  |                |                  |
|---------------------------------------------|-------------------------|----------------------------------------------------------|------------------|----------------|------------------|
|                                             |                         | COR                                                      | 95% CI           | AOR            | 95% CI           |
| <b>Type of Index cases</b>                  |                         |                                                          |                  |                |                  |
| SS+                                         | 223 (0.6)               | 1                                                        |                  |                |                  |
| SS-                                         | 242 (1.0)               | <u>1.85</u>                                              | <u>1.20–2.84</u> | <u>1.78</u>    | <u>1.16–2.75</u> |
| EPTB                                        | 116 (0.5)               | 0.88                                                     | 0.51–1.50        | 1.004          | 0.59–1.72        |
| <b>Time index cases completed treatment</b> |                         |                                                          |                  |                |                  |
| <12 months                                  | 313 (1.1)               | <u>2.69</u>                                              | <u>1.69–4.27</u> | <u>2.4</u>     | <u>1.50–3.82</u> |
| 12 months—23months                          | 131 (0.6)               | 1.4                                                      | 0.78–2.51        | 1.31           | 0.73–2.36        |
| > = 24 months                               | 137 (0.4)               | <u>1</u>                                                 |                  |                |                  |
| <b>Type of Contacts</b>                     |                         |                                                          |                  |                |                  |
| Household                                   | 542 (0.8)               | 1                                                        |                  |                |                  |
| Neighbor                                    | 32 (0.4)                | 0.47                                                     | 0.21–1.08        | 0.51           | 0.22–1.17        |
| Workplace and Others                        | 7 (2.3)                 | 0.12                                                     | <u>0.03–0.51</u> | 0.14           | 0.035–0.58       |
| <b>Sex of contacts</b>                      |                         |                                                          |                  |                |                  |
| Female                                      | 312 (0.70)              | 1                                                        |                  |                |                  |
| Male                                        | 269 (0.73)              | 0.95                                                     | 0.64–1.39        | Not applicable | Not applicable   |

doi:10.1371/journal.pone.0160514.t003

suggests that there is a need to consider contact tracing beyond households especially in congregated workplaces such as schools, mining areas and prisons. Further studies should include detailed work place related variables such as employment status, hours and working conditions so as to generate more evidence on factors associated with increased risk of TB in work place contacts.

We also involved neighbor visitors of the sick index cases for contact investigation. This is because most neighbors in rural Ethiopia are relatives and genetically related to the sick. It is also part of the tradition of Ethiopian society to visit and stay with the sick while they are possibly exposed. The yield was higher at 1.4% among the neighbor contacts. Cheng et al (2015) from Uganda showed that first degree relatives' contacts were more likely to be symptomatic for TB [18]. It was also shown by Lienherdt et al (2003) in Gambia that development of TB cases increased with first degree relatives compared with more distant and non-genetically related households [13]. In fact, it is possible that genetic factors contributed to the susceptibility to TB infection [15]. Also, Classen et al (1999) indicated the need to target contacts outside of households in high incidence TB areas to reduce TB transmission [35]. These studies from elsewhere suggest the need to consider close relatives for contact screening, and the higher yield among the neighbors in the current study suggests that retrospective contact is also a feasible strategy for contacts of neighbor and relatives.

The yield of TB among adult contacts was higher than that of child contacts, which is likely to be related with underdiagnoses among children due to diagnostic difficulties [36]. Most of the TB cases were also identified from close contacts of TB patients with SS+ which is in line with most studies [11, 15, 26, 27, 29, 30, and 37]. The greater proportion of childhood TB was detected from the contacts of SS-. It could be due to the selective nature of the prospective contact screening through which contacts of SS+ cases might have already been identified and taken care of. However, it needs further clarification in future studies. The fact that SS- can contribute to TB transmission has been shown in other studies [15–17]. The strategy of screening only those in contact with SS+ cases is likely to miss about one third of infected individuals [38].

Through the retrospective contact screening approach, we also detected TB cases from close contacts of EPTB index cases. Likewise, there are studies which included EPTB as an index case during active case findings [12, 39]. Contacts of patients with EPTB were evaluated because there are possibilities of associated pulmonary TB (PTB) cases [15]. Laryngeal TB and pleural TB are EPTB but can transmit TB as well [15–22]. There is also the opportunity to identify the real index cases of the identified EPTB that failed to be detected through the routine case detection strategy. Thus, in settings where TB is highly prevalent and there is a challenge of delay in the diagnosis there are possibilities of missed TB cases in the community [40]. Seeking for contacts of EPTB could detect the undiagnosed and missed TB cases which could be the real index cases of the EPTB. These could be cases that shared other common index cases but failed to seek health service. Therefore, comprehensive contact tracing should be considered in high burden settings.

The findings in this study should be interpreted cautiously as there were some limitations. We used symptom screening and light microscopy to diagnose SS+. Hence, a chance of missing the SS+ cases cannot be ruled out [41] though our study was done at health facilities that participated in a regular AFB microscopy external quality assessment (EQA) with concordance of 95% on random blinded rechecking [42]. In other studies, using digital X-rays in addition to symptom screening and fluorescent microscopy for diagnosis could not also detect all SS+ cases individuals [32, 33]. Also, we included limited number of variables which did not allow thorough evaluation of all the potential determinants of TB among contacts. In addition, only few of the neighbor close contacts were accessed and screened as most of them did not fulfill

the criteria of close contacts. However, this is the first study reporting the yield of retrospective contact screening from Ethiopia and perhaps one of a few globally [43]. The other strength of this study is the large number of contacts screened compared with earlier reports.

## Conclusions

The yield of retrospective contact screening through community-based approach was about six times the case notification in the study zones and contributed a significant proportion of all cases notified in the study districts. The risk of TB was high among contacts irrespective of the type of TB in the index case. This highlights that retrospective contact screening can be of high yield strategy among all types of index TB cases especially within one year of the registration of the index case. The yield was highest among work place contacts, suggesting the need to prioritize work place interventions for TB prevention and control. Further implementation and evaluation of retrospective contact screening should be done in similar settings to validate these findings. Such evaluations should include cost and cost-effectiveness studies.

## Supporting Information

**S1 Dataset. Data set for the retrospective contact investigation study.**

(DTA)

**S1 Table. The contact investigation register.**

(DOCX)

**S1 Text. Information sheet and oral informed consent form.**

(DOCX)

## Acknowledgments

The authors thank the clinicians, TB program coordinators and lay providers for their active role in the implementation of this intervention. We are so grateful to Oromia and Amhara regional health bureaus for their valuable support and collaboration in the implementation of this project intervention. We also acknowledge HEWs and residents of the six zones for assisting with data collection.

## References

1. World Health Organization. Global tuberculosis report, 2014. Annex 2: country profiles. WHO/HTM/TB/2014.08. Geneva, Switzerland: WHO, 2014.
2. Lienhardt C, Rowley J, Manneh K, Lahai G, Needham D, Milligan P, et al. Factors affecting time delay to treatment in a tuberculosis control programme in a sub-Saharan African country: the experience of The Gambia. *Int J Tuberc Lung Dis*. 2001; 5(3):233–9. Epub 2001/05/01 PMID: [11326822](#)
3. Sreeramareddy CT, Panduru KV, Menten J, Van den Ende J. Time delays in diagnosis of pulmonary tuberculosis: a systematic review of literature. *BMC Infect Dis*. 2009 Jun 11; 9:91. doi: [10.1186/1471-2334-9-91](#). Epub 2009/06/13. PMID: [19519917](#)
4. Wandwalo ER, Morkve O. Delay in tuberculosis case-finding and treatment in Mwanza, Tanzania. *Int J Tuberc Lung Dis*. 2000 Feb; 4(2):133–8. Epub 2000/02/29. PMID: [10694091](#)
5. Yimer S, Bjune G, Alene G. Diagnostic and treatment delay among pulmonary tuberculosis patients in Ethiopia: a cross sectional study. *BMC Infect Dis*. 2005 Dec 12; 5:112. Epub 2005/12/14. PMID: [16343350](#)
6. Tadesse T, Demissie M, Berhane Y, Kebede Y, Abebe M. Two-thirds of smear-positive tuberculosis cases in the community were undiagnosed in Northwest Ethiopia: population based cross-sectional study. *PLoS One*. 2011; 6(12):e28258. doi: [10.1371/journal.pone.0028258](#). Epub 2011 Dec 2. PMID: [22164256](#)

7. Pronyk RM, Makhubele MB, Hargreaves JR, Tollman SM, Hausler HP. Assessing health seeking behaviour among tuberculosis patients in rural South Africa. *Int J Tuberc Lung Dis.* 2001 Jul; 5(7):619–27. Epub 2001/07/27. PMID: [11467368](#)
8. Kiuwuwa MS, Charles K, Harriet MK. Patient and health service delay in pulmonary tuberculosis patients attending a referral hospital: a cross-sectional study. *BMC Public Health.* 2005 Nov 24; 5:122. Epub 2005/11/26. PMID: [16307685](#)
9. World Health Organization. Systematic screening for active tuberculosis: principles and recommendations. World Health Organization; 2013.
10. World Health Organization. Recommendations for investigating contacts of persons with infectious tuberculosis in low-and middle-income countries. World Health Organization; 2012.
11. Jerene D, Melese M, Kassie Y, Alem G, Daba SH, Hiruye N, et al. The yield of a tuberculosis household contact investigation in two regions of Ethiopia. *Int J Tuberc Lung Dis.* 2015 Aug; 19(8):898–903. doi: [10.5588/ijtld.14.0978](#). Epub 2015/07/15. PMID: [26162354](#)
12. Saunders MJ, Koh GC, Small AD, Dedicoat M. Predictors of contact tracing completion and outcomes in tuberculosis: a 21-year retrospective cohort study. *Int J Tuberc Lung Dis.* 2014 Jun; 18(6):640–6. doi: [10.5588/ijtld.13.0486](#). Epub 2014/06/07. PMID: [24903932](#)
13. Lienhardt C, Fielding K, Sillah J, Tunkara A, Donkor S, Manneh K, et al. Risk factors for tuberculosis infection in sub-Saharan Africa: a contact study in The Gambia. *Am J Respir Crit Care Med.* 2003 Aug 15; 168(4):448–55. Epub 2003 May 28. PMID: [12773322](#)
14. Assefa D, Klinkenberg E, Yosef G. Cross Sectional Study Evaluating Routine Contact Investigation in Addis Ababa, Ethiopia: A Missed Opportunity to Prevent Tuberculosis in Children. *PLoS One.* 2015 Jun 17; 10(6):e0129135. doi: [10.1371/journal.pone.0129135](#). eCollection 2015. Epub 2015/06/18. PMID: [26083244](#)
15. Tostmann A, Kik SV, Kalisvaart NA, Sebek MM, Verver S, Boeree MJ, et al. Tuberculosis transmission by patients with smear-negative pulmonary tuberculosis in a large cohort in the Netherlands. *Clin Infect Dis.* 2008 Nov 1; 47(9):1135–42. doi: [10.1086/591974](#). Epub 2008/10/01. PMID: [18823268](#)
16. James JS. Tuberculosis control: many cases found transmitted despite negative result on standard test. *AIDS Treat News.* 1999 Feb 19; (No 313):5–6. Epub 2001/05/22.
17. Behr MA, Warren SA, Salamon H, Hopewell PC, Ponce de Leon A, Daley CL, et al. Transmission of *Mycobacterium tuberculosis* from patients smear-negative for acid-fast bacilli. *Lancet.* 1999 Feb 6; 353(9151):444–9. Epub 1999/02/16. PMID: [9989714](#)
18. Chheng P, Nsereko M, Malone LL, Okware B, Zalwango S, Joloba M, et al. Tuberculosis case finding in first-degree relative contacts not living with index tuberculosis cases in Kampala, Uganda. *Clin Epidemiol.* 2015 Oct 13; 7:411–9. doi: [10.2147/CLEP.S82389](#). eCollection 2015. Epub 2015/10/29. PMID: [26508888](#)
19. Duarte R, Neto M, Carvalho A, Barros H. Improving tuberculosis contact tracing: the role of evaluations in the home and workplace. *Int J Tuberc Lung Dis.* 2012 Jan; 16(1):55–9. doi: [10.5588/ijtld.10.0511](#). Epub 2012/01/13. PMID: [22236846](#)
20. World Health Organization. Global tuberculosis report 2015. Available: <http://apps.who.int/iris/handle/10665/191102>
21. Federal Democratic republic of Ethiopia. ANNUAL TBL BULLETIN NO 5, 2013. Addis Ababa, Ethiopia; 2013
22. Munsiff SS, Nilsen D and Fujiwara PI. Clinical Policies and Protocols, 4th Edition. Bureau of Tuberculosis Control New York City Department of Health and Mental Hygiene, March 2008.
23. FMOH E. Tuberculosis, Leprosy and TB/HIV Prevention and Control Programme. Addis Ababa, Ethiopia. 2008; 207.
24. Schlomer GL, Bauman S, Card NA. Best practices for missing data management in counseling psychology. *J Couns Psychol.* 2010 Jan; 57(1):1–10. doi: [10.1037/a0018082](#). Epub 2010/12/08. PMID: [21133556](#)
25. Becerra MC, Pachao-Torreblanca IF, Bayona J, Celi R, Shin SS, Kim JY, et al. Expanding tuberculosis case detection by screening household contacts. *Public Health Rep.* 2005 May-Jun; 120(3):271–7. Epub 2005/09/02. PMID: [16134567](#)
26. Beyers N, Gie RP, Schaaf HS, Van Zyl S, Talent JM, Nel ED, et al. A prospective evaluation of children under the age of 5 years living in the same household as adults with recently diagnosed pulmonary tuberculosis. *Int J Tuberc Lung Dis.* 1997 Feb; 1(1):38–43. Epub 1997/02/01. PMID: [9441057](#)
27. Kilicaslan Z, Kiyani E Fau—Kucuk C, Kucuk C Fau—Kumbetli S, Kumbetli S Fau—Sarimurat N, Sarimurat N Fau—Ozturk F, Ozturk F Fau—Yapici D, et al. Risk of active tuberculosis in adult household contacts of smear-positive pulmonary tuberculosis cases. *Int J Tuberc Lung Dis.* 2009 Jan; 13(1):93–8. *Int J Tuberc Lung Dis.* 2009 Jan; 13(1):93–8. PMID: [19105885](#)

28. Shapiro AE, Variava E Fau—Rakgokong MH, Rakgokong Mh Fau—Moodley N, Moodley N Fau—Luke B, Luke B Fau—Salimi S, Salimi S Fau—Chaisson RE, et al. Community-based targeted case finding for tuberculosis and HIV in household contacts of patients with tuberculosis in South Africa. *Am J Respir Crit Care Med*. 2012 May 15; 185(10):1110–6. doi: [10.1164/rccm.201111-1941OC](https://doi.org/10.1164/rccm.201111-1941OC). Epub 2012 Mar 15. PMID: [22427532](https://pubmed.ncbi.nlm.nih.gov/22427532/)
29. Singh M, Mynak ML, Kumar L, Mathew JL, Jindal SK. Prevalence and risk factors for transmission of infection among children in household contact with adults having pulmonary tuberculosis. *Arch Dis Child*. 2005 Jun; 90(6):624–8. Epub 2005/05/24. PMID: [15908630](https://pubmed.ncbi.nlm.nih.gov/15908630/)
30. Salinas C, Capelastegui A, Altube L, Espana PP, Diez R, Oribe M, et al. Longitudinal incidence of tuberculosis in a cohort of contacts: factors associated with the disease. *Arch Bronconeumol*. 2007 Jun; 43(6):317–23. Epub 2007/06/23. PMID: [17583641](https://pubmed.ncbi.nlm.nih.gov/17583641/)
31. Fox GJ, Barry SE, Britton WJ, Marks GB. Contact investigation for tuberculosis: a systematic review and meta-analysis. *Eur Respir J*. 2013 Jan; 41(1):140–56. doi: [10.1183/09031936.00070812](https://doi.org/10.1183/09031936.00070812). Epub 2012 Aug 30. PMID: [22936710](https://pubmed.ncbi.nlm.nih.gov/22936710/)
32. Kebede AH, Alebachew Z, Tsegaye F, Lemma E, Abebe A, Agonafir M, et al. The first population-based national tuberculosis prevalence survey in Ethiopia, 2010–2011. *Int J Tuberc Lung Dis*. 2014 Jun; 18(6):635–9. doi: [10.5588/ijtld.13.0417](https://doi.org/10.5588/ijtld.13.0417). Epub 2014/06/07. PMID: [24903931](https://pubmed.ncbi.nlm.nih.gov/24903931/)
33. Sebhatu M, Kiflom B, Seyoum M, Kassim N, Negash T, Tesfazion A, et al. Determining the burden of tuberculosis in Eritrea: a new approach. *Bull World Health Organ*. 2007 Aug; 85(8):593–9. Epub 2007/09/05. PMID: [17768517](https://pubmed.ncbi.nlm.nih.gov/17768517/)
34. Verdier JE, Jan de Vlas S, Kidgell-Koppelaar ID, Richardus JH. Risk factors for tuberculosis in contact investigations in Rotterdam, the Netherlands. *Infect Dis Rep*. 2012 Apr 3; 4(2):e26. doi: [10.4081/idr.2012.e26](https://doi.org/10.4081/idr.2012.e26). eCollection 2012. Epub 2012/04/27. PMID: [24470940](https://pubmed.ncbi.nlm.nih.gov/24470940/)
35. Classen CN, Warren R, Richardson M, Hauman JH, Gie RP, Ellis JH, et al. Impact of social interactions in the community on the transmission of tuberculosis in a high incidence area. *Thorax*. 1999 Feb; 54(2):136–40. Epub 1999/05/18. PMID: [10325918](https://pubmed.ncbi.nlm.nih.gov/10325918/)
36. Osborne CM. The challenge of diagnosing childhood tuberculosis in a developing country. *Arch Dis Child*. 1995 Apr; 72(4):369–74. Epub 1995/04/01. PMID: [7763076](https://pubmed.ncbi.nlm.nih.gov/7763076/)
37. Xu C, Hu B. [Prevalence of active pulmonary tuberculosis among household contacts of recently diagnosed pulmonary tuberculosis patients with positive sputum-smear]. *Zhonghua Liu Xing Bing Xue Za Zhi*. 2008 Jul; 29(7):693–5. Epub 2008/11/27. PMID: [19031763](https://pubmed.ncbi.nlm.nih.gov/19031763/)
38. World Health Organization. World Health Organization Global Tuberculosis Report 2013. WHO Press, Geneva, Switzerland
39. Lienhardt C, Fielding K, Sillah JS, Bah B, Gustafson P, Warndorff D, et al. Investigation of the risk factors for tuberculosis: a case-control study in three countries in West Africa. *Int J Epidemiol*. 2005 Aug; 34(4):914–23. Epub 2005 May 24. PMID: [15914505](https://pubmed.ncbi.nlm.nih.gov/15914505/)
40. Demissie M, Lindtjorn B, Berhane Y. Patient and health service delay in the diagnosis of pulmonary tuberculosis in Ethiopia. *BMC Public Health*. 2002 Sep 25; 2:23. Epub 2002 Sep 25. PMID: [12296975](https://pubmed.ncbi.nlm.nih.gov/12296975/)
41. Gothi GD, Narayan R, Nair SS, Chakraborty AK, Srikantaramu N. Estimation of prevalence of bacillary tuberculosis on the basis of chest X-ray and/or symptomatic screening. *Indian J Med Res*. 1976 Aug; 64(8):1150–9. Epub 1976/08/01. PMID: [1086830](https://pubmed.ncbi.nlm.nih.gov/1086830/)
42. Melese M, Jerene D, Alem G, Seid J, Belachew F, Kassie Y, et al. Decentralization of Acid Fast Bacilli (AFB) External Quality Assurance Using Blind Rechecking for Sputum Smear Microscopy in Ethiopia. *PLoS One*. 2016 Mar 18; 11(3):e0151366. doi: [10.1371/journal.pone.0151366](https://doi.org/10.1371/journal.pone.0151366). eCollection 2016. Epub 2016/03/19. PMID: [26991651](https://pubmed.ncbi.nlm.nih.gov/26991651/)
43. Morishita F, Eang MT, Nishikiori N, Yadav RP. Increased Case Notification through Active Case Finding of Tuberculosis among Household and Neighborhood Contacts in Cambodia. *PloS one*. 2016 Mar 1; 11(3):e0150405. <http://dx.doi.org/10.1371/journal.pone.0150405>. doi: [10.1371/journal.pone.0150405](https://doi.org/10.1371/journal.pone.0150405) PMID: [26930415](https://pubmed.ncbi.nlm.nih.gov/26930415/)
